# Supplementary material
Source: ML conference proceedings conference paper supplement (https://openreview.net/forum?id=WjDj6W872v)
Supplement: supplementary_material [file attachment]

---

# Connected Superlevel Set in (Deep) Reinforcement Learning and its Application to Minimax Theorems

---

Anonymous Author(s)

Affiliation

Address

email

## Abstract

1 The aim of this paper is to improve the understanding of the optimization landscape  
2 for policy optimization problems in reinforcement learning. Specifically, we show  
3 that the superlevel set of the objective function with respect to the policy parameter  
4 is always a connected set both in the tabular setting and under policies represented  
5 by a class of neural networks. In addition, we show that the optimization objective  
6 as a function of the policy parameter and reward satisfies a stronger “equiconnect-  
7 edness” property. To our best knowledge, these are novel and previously unknown  
8 discoveries.

9 We present an application of the connectedness of these superlevel sets to the deriva-  
10 tion of minimax theorems for robust reinforcement learning. We show that any  
11 minimax optimization program which is convex on one side and is equiconnected  
12 on the other side observes the minimax equality (i.e. has a Nash equilibrium). We  
13 find that this exact structure is exhibited by an interesting class of robust reinforce-  
14 ment learning problems under an adversarial reward attack, and the validity of  
15 its minimax equality immediately follows. This is the first time such a result is  
16 established in the literature.

## 17 1 Introduction

18 Policy optimization problems in reinforcement learning (RL) are usually formulated as the maximiza-  
19 tion of a non-concave objective function over a convex constraint set. Such non-convex programs  
20 are generally difficult to solve globally, as gradient-based optimization algorithms can be trapped in  
21 sub-optimal first-order stationary points. Interestingly, recent advances in RL theory [Fazel et al.,  
22 2018, Agarwal et al., 2021, Mei et al., 2020] have discovered a “gradient domination” structure in the  
23 optimization landscape, which qualitatively means that every stationary point of the objective function  
24 is globally optimal. An important consequence of this condition is that any first-order algorithm that  
25 converges to a stationary point is guaranteed to find the global optimality.

26 In this work, our aim is to enhance the understanding of the optimization landscape in RL beyond  
27 the gradient domination condition. Inspired by Mohammadi et al. [2021], Fatkhullin and Polyak  
28 [2021] that discuss properties of the sublevel set for the linear-quadratic regulator (LQR), we study  
29 the superlevel set of the policy optimization objective under a Markov decision process (MDP)  
30 framework and prove that it is always connected.

31 As an immediate consequence, we show that any minimax optimization program which is convex on  
32 one side and is an RL objective on the other side observes the minimax equality. We apply this result  
33 to derive an interesting and previously unknown minimax theorem for robust RL. We also note that it  
34 is unclear at the moment, but certainly possible, that the result on connected superlevel sets may be  
35 exploited to design more efficient and reliable policy optimization algorithms in the future.

## 36 1.1 Main Contribution

37 Our first contribution in this work is to show that the superlevel set of the policy optimization problem  
38 in RL is always connected under a tabular policy representation. We then extend this result to the  
39 deep reinforcement learning setting, where the policy is represented by a class of over-parameterized  
40 neural networks. We show that the superlevel set of the underlying objective function with respect  
41 to the policy parameters (i.e. weights of the neural networks) is connected at all levels. We further  
42 prove that the policy optimization objective as a function of the policy parameter and reward is  
43 “equiconnected”, which is a stronger result that we will define and introduce later in the paper. To  
44 the best of our knowledge, our paper is the first to rigorously investigate the connectedness of the  
45 superlevel sets for the MDP policy optimization program, both in the tabular case and with a neural  
46 network policy class.

47 As a downstream application, we discuss how our main results can be used to derive a minimax  
48 theorem for a class of robust RL problems. We consider the scenario where an adversary strategically  
49 modifies the reward function to trick the learning agent. Aware of the attack, the learning agent  
50 defends against the poisoned reward by solving a minimax optimization program. The formulation for  
51 this problem is proposed and considered in Banihashem et al. [2021], Rakhsha et al. [2020]. However,  
52 as a fundamental question, the validity of the minimax theorem (or equivalently, the existence of a  
53 Nash equilibrium) is still unknown. We fill in this gap by establishing the minimax theorem as a  
54 simple consequence of the equiconnectedness of the policy optimization objective.

## 55 1.2 Related Works

56 Our paper is closely connected to the existing works that study the structure of policy optimization  
57 problems in RL, especially those on the gradient domination condition. Our result also relates to the  
58 literature on minimax optimization for various function classes and robust RL. We discuss the recent  
59 advances in these domains to give context to our contributions.

60 **Gradient Domination Condition.** The policy optimization problem in RL is non-convex but obeys  
61 the special “gradient domination” structure that allows first-order algorithms to provably converge  
62 to the globally optimal policy. In the settings of LQR [Fazel et al., 2018, Yang et al., 2019] and  
63 entropy-regularized MDP [Mei et al., 2020, Cen et al., 2022], the gradient domination structure can  
64 be mathematically described by the Polyak-Łojasiewicz (PŁ) condition, which bears a resemblance  
65 to strong convexity but does not even imply convexity. It is known that functions observing this  
66 condition can be optimized globally and efficiently by (stochastic) optimization algorithms [Karimi  
67 et al., 2016, Gower et al., 2021, Zeng et al., 2021]. When the policy optimization problem under a  
68 standard, non-regularized MDP is considered, the gradient domination structure is weaker than the  
69 PŁ condition but still takes the form of upper bounding a global optimality gap by a measure of the  
70 magnitude of the gradient [Bhandari and Russo, 2019, Agarwal et al., 2020, 2021]. In all scenarios,  
71 the gradient domination structure prevents any stationary point from being sub-optimal.

72 It may be tempting to think that the gradient domination condition and the connectedness of the  
73 superlevel sets are strongly connected notions or may even imply one another. For 1-dimensional  
74 function ( $f : \mathbb{R}^n \rightarrow \mathbb{R}$  with  $n = 1$ ), it is easy to verify that the gradient domination condition  
75 necessarily implies the connectedness of the superlevel sets. However, when  $n \geq 2$  this is no  
76 longer true. In general, the gradient domination condition neither implies nor is implied by the  
77 connectedness of superlevel sets, which we illustrate with examples in Section 1.3. These two  
78 structural properties are distinct concepts that characterize the optimization landscape from different  
79 angles. This observation precludes the possibility of deriving the connectedness of the superlevel  
80 sets in RL simply from the existing results on the gradient domination condition, and suggests that a  
81 tailored analysis is required.

82 **Minimax Optimization & Minimax Theorems.** Consider a function  $f : \mathcal{X} \times \mathcal{Y} \rightarrow \mathbb{R}$  on convex  
83 sets  $\mathcal{X}, \mathcal{Y}$ . In general, the minimax inequality always holds

$$\sup_{x \in \mathcal{X}} \inf_{y \in \mathcal{Y}} f(x, y) \leq \inf_{y \in \mathcal{Y}} \sup_{x \in \mathcal{X}} f(x, y).$$

84 The seminal work Neumann [1928] shows that this inequality holds as an equality for matrix games  
85 where  $\mathcal{X} \subseteq \mathbb{R}^m, \mathcal{Y} \subseteq \mathbb{R}^n$  are probability simplexes and we have  $f(x, y) = x^\top A y$  given a payoff  
86 matrix  $A \in \mathbb{R}^{m \times n}$ . The result later gets generalized to the setting where  $\mathcal{X}, \mathcal{Y}$  are compact sets,  
87  $f(x, \cdot)$  is quasi-convex for all  $x \in \mathcal{X}$ , and  $f(\cdot, y)$  is quasi-concave for all  $y \in \mathcal{Y}$  [Fan, 1953, Sion,

88 1958]. Much more recently, Yang et al. [2020] establishes the minimax equality when  $f$  satisfies the  
 89 two-sided PL condition. For arbitrary functions  $f$ , the minimax equality need not be valid.

90 The validity of the minimax equality is essentially equivalent to the existence of a global Nash  
 91 equilibrium  $(x^*, y^*)$  such that

$$f(x, y^*) \leq f(x^*, y^*) \leq f(x^*, y), \quad \forall x \in \mathcal{X}, y \in \mathcal{Y}.$$

92 The Nash equilibrium  $(x^*, y^*)$  is a point where neither player can improve their objective function  
 93 value by changing its strategy. In general nonconvex-nonconcave settings where the global Nash  
 94 equilibrium may not exist, alternative approximate local/global optimality notions are proposed  
 95 [Daskalakis and Panageas, 2018, Nouiheed et al., 2019, Adolphs et al., 2019, Jin et al., 2020].

96 **Robust Reinforcement Learning.** Robust RL studies finding the optimal policy in the worst-case  
 97 scenario under environment uncertainty and/or possible adversarial attacks. Various robust RL  
 98 models have been considered in the existing literature, such as: 1) the learning agent operates under  
 99 uncertainty in the transition probability kernel [Goyal and Grand-Clement, 2022, Li et al., 2022,  
 100 Panaganti and Kalathil, 2022, Wang et al., 2023], 2) an adversary exists and plays a two-player  
 101 zero-sum Markov game against the learning agent [Pinto et al., 2017, Tessler et al., 2019], 3) the  
 102 adversary does not affect the state transition but may manipulate the state observation [Havens et al.,  
 103 2018, Zhang et al., 2020], 4) there is uncertainty or attack only on the reward [Wang et al., 2020,  
 104 Banihashem et al., 2021, Sarkar et al., 2022], 5) the learning agent defends attacks from a population  
 105 of adversaries rather than a single one [Vinitzky et al., 2020]. A particular attack and defense model  
 106 considered later in our paper is adapted from Banihashem et al. [2021].

107 **Other Works on Connected Level Sets in Machine Learning.** Last but not least, we note that our  
 108 paper is related to the works that study the connectedness of the sublevel sets for the LQR optimization  
 109 problem [Fatkhullin and Polyak, 2021] and for deep supervised learning under a regression loss  
 110 [Nguyen, 2019]. The neural network architecture considered in our paper is inspired by and similar  
 111 to the one in Nguyen [2019]. However, our result and analysis on deep RL are novel and significantly  
 112 more challenging to establish, since 1) the underlying loss function in Nguyen [2019] is convex, while  
 113 ours is a non-convex policy optimization objective, 2) the analysis of Nguyen [2019] relies critically  
 114 on the assumption that the activation functions are uniquely invertible, while we use a non-uniquely  
 115 invertible softmax activation function to generate policies within the probability simplex.

### 116 1.3 Connection between Gradient Domination and Connected Superlevel Sets

117 We loosely use the term “gradient domination” to indicate that a differentiable function does not  
 118 have any sub-optimal stationary points. In this section, we use two examples to show that the  
 119 gradient domination condition in general does not implies or get implied by the connectedness of the  
 120 superlevel sets. The first example is a function that observes the gradient domination condition but  
 121 has a disconnected set of maximizers (which implies that the superlevel is not always connected).

122 Consider  $f : [-4, 4] \times [-2, 0] \rightarrow \mathbb{R}$

$$f(x, y) = \begin{cases} f_1(x, y) = -(x-1)^3 + 3(x-1) - y^2 - 2y - 0.02(y+10)^2(10-x^2), & \text{for } x \geq 0 \\ f_2(x, y) = -(-x-1)^3 + 3(-x-1) - y^2 - 2y - 0.02(y+10)^2(10-x^2), & \text{else} \end{cases}$$

123 It is obvious that the function is symmetric along the line  $x = 0$  and that  $f_1(0, y) = f_2(0, y)$  for all  
 124  $y \in [-2, 0]$ . Computing the derivatives of  $f_1$  and  $f_2$  with respect to  $x$ , we have

$$\begin{aligned} \nabla_x f_1(x, y) &= -3(x-1)^2 + 3 + 0.04x(y+10)^2, \\ \nabla_x f_2(x, y) &= 3(x+1)^2 - 3 + 0.04x(y+10)^2. \end{aligned}$$

125 We can again verify  $\nabla_x f_1(0, y) = \nabla_x f_2(0, y)$  for all  $y$ , which implies that the function  $f$  is  
 126 everywhere continuous and differentiable. Visualization of  $f$  in Fig. 1 along with simple calculation  
 127 (solving the system of equations  $\nabla_x f(x, y) = 0$  and  $\nabla_y f(x, y) = 0$ ) show that there are only  
 128 two stationary points of  $f$  on  $[-4, 4] \times [-2, 0]$ . The two stationary points are  $(3.05, -1.12)$  and  
 129  $(-3.05, -1.12)$ , and they are both global maximizers on this domain, which means that the gradient  
 130 domination condition is observed. However, the set of maximizers  $\{(3.05, -1.12), (-3.05, -1.12)\}$   
 131 is clearly disconnected.

132 We next present a function that has connected superlevel sets at all level but does not observe the  
 133 gradient domination condition (i.e. has sub-optimal stationary points).

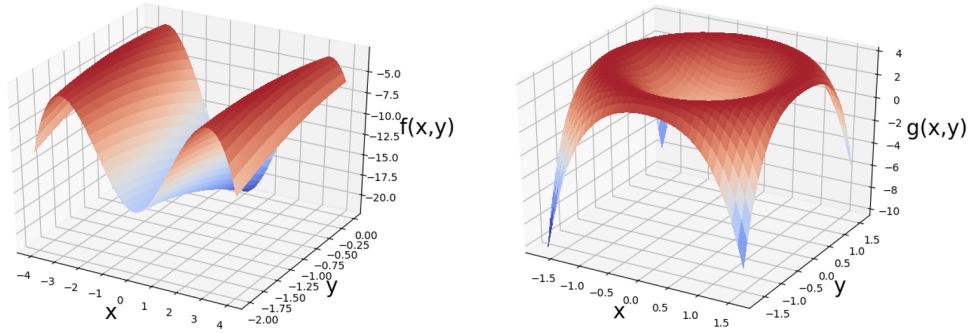

Figure 1: Visualization of Functions  $f$  (Left) and  $g$  (Right)

134 Consider  $g : \mathbb{R}^2 \rightarrow \mathbb{R}$  defined as

$$g(x, y) = -(x^2 + y^2)^2 + 4(x^2 + y^2).$$

135 This is a volcano-shaped function, which we visualize in Fig. 1. It is obvious the superlevel set  
 136  $\{(x, y) : g(x, y) \geq \lambda\}$  is always either a 2D circle (convex set) or a donut-shaped connected set  
 137 depending on the choice of  $\lambda$ . However, the gradient domination condition does not hold as  $(0, 0)$  is  
 138 a first-order stationary point but not a global maximizer (it is actually a local minimizer).

139 **Outline of the paper.** The rest of the paper is organized as follows. In Section 2, we discuss the policy  
 140 optimization problem in the tabular setting and establish the connectedness of the superlevel sets. Section  
 141 3 generalizes the result to a class of policies represented by over-parameterized neural networks.  
 142 We introduce the structure of the neural network and the definition of super level sets in this context,  
 143 and present our theoretical result. In Section 4, we use our main results on superlevel sets to derive two  
 144 minimax theorems for robust RL. Finally, we conclude in Section 5 with remarks on future directions.

## 145 2 Connected Superlevel Set Under Tabular Policy

146 We consider the infinite horizon, average reward MDP characterized by  $\mathcal{M} = (\mathcal{S}, \mathcal{A}, \mathcal{P}, r)$ . We use  
 147  $\mathcal{S}$  and  $\mathcal{A}$  to denote the state and action spaces, which we assume are finite. The transition probability  
 148 kernel is denoted by  $\mathcal{P} : \mathcal{S} \times \mathcal{A} \rightarrow \Delta_{\mathcal{S}}$ , where  $\Delta_{\mathcal{S}}$  denotes the probability simplex over  $\mathcal{S}$ . The  
 149 reward function  $r : \mathcal{S} \times \mathcal{A} \rightarrow [0, U_r]$  is bounded for some positive constant  $U_r$  and can also be  
 150 regarded as a vector in  $\mathbb{R}^{|\mathcal{S}| \times |\mathcal{A}|}$ . We use  $P^\pi \in \mathbb{R}^{\mathcal{S} \times \mathcal{S}}$  to represent the state transition probability  
 151 matrix under policy  $\pi \in \Delta_{\mathcal{A}}^{\mathcal{S}}$ , where  $\Delta_{\mathcal{A}}^{\mathcal{S}}$  is the collection of probability simplexes over  $\mathcal{A}$  across the  
 152 state space

$$P_{s',s}^\pi = \sum_{a \in \mathcal{A}} \mathcal{P}(s' | s, a) \pi(a | s), \quad \forall s', s \in \mathcal{S}. \quad (1)$$

153 We consider the following ergodicity assumption in the rest of the paper, which is commonly made in  
 154 the RL literature [Wang, 2017, Wei et al., 2020, Wu et al., 2020].

155 **Assumption 1** *Given any policy  $\pi$ , the Markov chain formed under the transition probability matrix*  
 156  *$P^\pi$  is ergodic, i.e. irreducible and aperiodic.*

157 Let  $\mu_\pi \in \Delta_{\mathcal{S}}$  denote the stationary distribution of the states induced by policy  $\pi$ . As a consequence  
 158 of Assumption 1, the stationary distribution  $\mu_\pi$  is unique and uniformly bounded away from 0 under  
 159 any  $\pi$ . In addition,  $\mu_\pi$  is the unique eigenvector of  $P^\pi$  with the associated eigenvalue equal to 1, i.e.  
 160  $\mu_\pi = P^\pi \mu_\pi$ . Let  $\hat{\mu}_\pi \in \Delta_{\mathcal{S} \times \mathcal{A}}$  denote the state-action stationary distribution induced by  $\pi$ , which  
 161 can be expressed as

$$\hat{\mu}_\pi(s, a) = \mu_\pi(s) \pi(a | s). \quad (2)$$

162 We measure the performance of a policy  $\pi$  under reward function  $r$  by the average cumulative reward  
 163  $J_r(\pi)$

$$J_r(\pi) \triangleq \lim_{K \rightarrow \infty} \frac{\sum_{k=0}^K r(s_k, a_k)}{K} = \mathbb{E}_{s \sim \mu_\pi, a \sim \pi} [r(s, a)] = \sum_{s, a} r(s, a) \hat{\mu}_\pi(s, a).$$

164 The objective of the policy optimization problem is to find the policy  $\pi$  that maximizes the average  
 165 cumulative reward

$$\max_{\pi \in \Delta_{\mathcal{A}}^S} J_r(\pi). \quad (3)$$

166 The superlevel set of  $J_r$  is the set of policies that achieve a value function greater than or equal to  
 167 a specified level. Formally, given  $\lambda \in \mathbb{R}$ , the  $\lambda$ -superlevel set (or superlevel set) under reward  $r$  is  
 168 defined as

$$\mathcal{U}_{\lambda, r} \triangleq \{\pi \in \Delta_{\mathcal{A}}^S \mid J_r(\pi) \geq \lambda\}.$$

169 The main focus of this section is to study the connectedness of this set  $\mathcal{U}_{\lambda, r}$ , which requires us to  
 170 formally define a connected set.

171 **Definition 1** A set  $\mathcal{U}$  is connected if for any  $x, y \in \mathcal{U}$  there exists a continuous map  $p : [0, 1] \rightarrow \mathcal{U}$   
 172 such that  $p(0) = x$  and  $p(1) = y$ .

173 We say that a function is connected if its superlevel sets are connected at all levels. We also introduce  
 174 the definition of equiconnected functions.

175 **Definition 2** Given two spaces  $\mathcal{X}$  and  $\mathcal{Y}$ , the collection of functions  $\{f_y : \mathcal{X} \rightarrow \mathbb{R}\}_{y \in \mathcal{Y}}$  is said to be  
 176 equiconnected if for every  $x_1, x_2 \in \mathcal{X}$ , there exists a continuous path map  $p : [0, 1] \rightarrow \mathcal{X}$  such that

$$p(0) = x_1, \quad p(1) = x_2, \quad f_y(p(\alpha)) \geq \min\{f_y(x_1), f_y(x_2)\},$$

177 for all  $\alpha \in [0, 1]$  and  $y \in \mathcal{Y}$ .

178 Conceptually, the collection of functions  $\{f_y : \mathcal{X} \rightarrow \mathbb{R}\}_{y \in \mathcal{Y}}$  being equiconnected requires 1) that  
 179  $f_y(\cdot)$  is a connected function for all  $y \in \mathcal{Y}$  (or equivalently, the set  $\{x \in \mathcal{X} : f_y(x) \geq \lambda\}$  is  
 180 connected for all  $\lambda \in \mathbb{R}$  and  $y \in \mathcal{Y}$ ) and 2) that the path map constructed to prove the connectedness  
 181 of  $\{x \in \mathcal{X} : f_y(x) \geq \lambda\}$  is independent of  $y$ .

182 We now present our first main result of the paper, which states that the superlevel set  $\mathcal{U}_{\lambda, r}$  is always  
 183 connected.

184 **Theorem 1** Under Assumption 1, the superlevel set  $\mathcal{U}_{\lambda, r}$  is connected for any  $\lambda \in \mathbb{R}$  and  $r \in \mathbb{R}^{|\mathcal{S}| \times |\mathcal{A}|}$ .  
 185 In addition, the collection of functions  $\{J_r(\cdot) : \Delta_{\mathcal{A}}^S \rightarrow \mathbb{R}\}_{r \in \mathbb{R}^{|\mathcal{S}| \times |\mathcal{A}|}}$  is equiconnected.

186 The claim in Theorem 1 on the equiconnectedness of  $\{J_r\}_{r \in \mathbb{R}^{|\mathcal{S}| \times |\mathcal{A}|}}$  is a slightly stronger result  
 187 than the connectedness of  $\mathcal{U}_{\lambda, r}$ , and plays an important role in the application to minimax theorems  
 188 discussed later in Section 4.

189 We note that the proof, presented in Section A.1 of the appendix, is mainly leverages the fact that the  
 190 value function  $J_r(\pi)$  is linear in the state-action stationary distribution  $\hat{\mu}_\pi$  and that there is a special  
 191 connection (though nonlinear and nonconvex) between  $\hat{\mu}_\pi$  and the policy  $\pi$ , which we take advantage  
 192 of to construct the continuous path map for the analysis. Specifically, given two policies  $\pi_1, \pi_2$  with  
 193  $J_r(\pi_1), J_r(\pi_2) \geq \lambda$ , we show that the policy  $\pi_\alpha$  defined as

$$\pi_\alpha(a \mid s) = \frac{\alpha \mu_{\pi_1}(s) \pi_1(a \mid s) + (1 - \alpha) \mu_{\pi_2}(s) \pi_2(a \mid s)}{\alpha \mu_{\pi_1}(s) + (1 - \alpha) \mu_{\pi_2}(s)}, \quad \forall \alpha \in [0, 1]$$

194 is guaranteed to achieve  $J_r(\pi_\alpha)$  for all  $\alpha \in [0, 1]$ .

195 Besides playing a key role in the proof of Theorem 1, our construction of this path map may inform  
 196 the design of algorithms in the future. Given any two policies with a certain guaranteed performance,  
 197 we can generate a continuum of policies at least as good. As a consequence, if we find two optimal  
 198 policies (possibly by gradient descent from different initializations) we can generate a range of  
 199 interpolating optimal policies. If the agent has a preference over these policy (for example, to  
 200 minimize certain energy like in  $H_1$  control, or if some policies are easier to implement physically),  
 201 then the selection can be made on the continuum of optimal policies, which eventually leads to a  
 202 more preferred policy.

### 203 3 Connected Superlevel Set Under Neural Network Parameterized Policy

204 In real-world reinforcement learning applications, it is common to use a deep neural network to  
 205 parameterize the policy [Silver et al., 2016, Arulkumaran et al., 2017]. In this section, we consider the  
 206 policy optimization problem under a special class of policies represented by an over-parameterized  
 207 neural network and show that this problem still enjoys the important structure — the connectedness of  
 208 the superlevel sets — despite the presence of the highly complex function approximation. Illustrated  
 209 in Fig. 2, the neural network parameterizes the policy in a very natural manner which matches how  
 210 neural networks are actually used in practice.

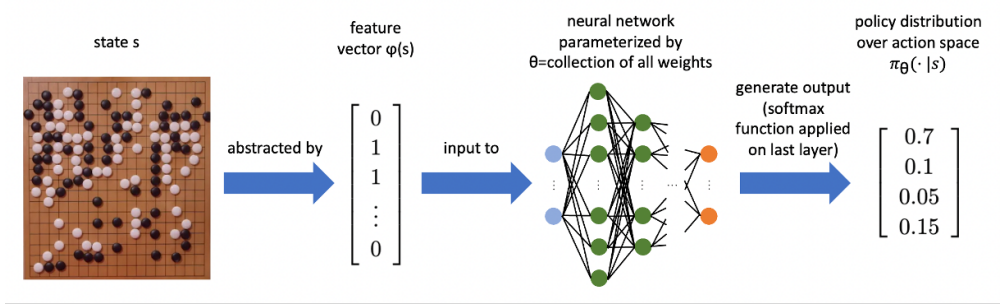

Figure 2: Neural Network Policy Representation

211 Mathematically, the parameterization can be described as follows. Each state  $s \in \mathcal{S}$  is associated  
 212 with a feature vector  $\phi(s) \in \mathbb{R}^d$ , which in practice is usually carefully selected to summarize the key  
 213 information of the state. For state identifiability, we assume that the feature vector of each state is  
 214 unique, i.e.

$$\phi(s) \neq \phi(s'), \quad \forall s, s' \in \mathcal{S} \text{ and } s \neq s'.$$

215 To map a feature vector  $\phi(s)$  to a policy distribution over state  $s$ , we employ a  $L$ -layer neural network,  
 216 which in the  $k$ th layer has weight matrix  $W_k \in \mathbb{R}^{n_{k-1} \times n_k}$  and bias vector  $b_k \in \mathbb{R}^{n_k}$  with  $n_0 = d$   
 217 and  $n_L = |\mathcal{A}|$ . For the simplicity of notation, we use  $\Omega_k$  to denote the space of weight and bias  
 218 parameters  $(W_k, b_k)$  of layer  $k$ , and we write  $\Omega = \Omega_1 \times \dots \times \Omega_L$ .  $\theta$  denotes the collection of the  
 219 weights and biases

$$\theta = ((W_1, b_1), \dots, (W_L, b_L)) \in \Omega$$

220 We use the same activation function for layers 1 through  $L - 1$ , denoted by  $\sigma : \mathbb{R} \rightarrow \mathbb{R}$ , which can be  
 221 applied in an element-wise fashion to vectors. To ensure that the output of the neural network is a  
 222 valid probability distribution, the activation function for the last layer is a softmax function, denoted  
 223 by  $\psi : \mathbb{R}^{|\mathcal{A}|} \rightarrow \Delta_{\mathcal{A}}$ , i.e. for any vector  $v \in \mathbb{R}^{|\mathcal{A}|}$

$$\psi(v)_i = \frac{\exp(v_i)}{\sum_{i'=1}^{|\mathcal{A}|} \exp(v_{i'})}, \quad \forall i = 1, \dots, |\mathcal{A}|.$$

224 With  $v \in \mathbb{R}^d$  as the input to a neural network with parameters  $\theta$ , we use  $f_k^\theta(v) \in \mathbb{R}^{n_k}$  to denote the  
 225 output of the network at layer  $k$ . For  $k = 1, \dots, L$ ,  $f_k^\theta(v)$  is computed as

$$f_k^\theta(v) = \begin{cases} \sigma(W_1^\top v + b_1) & k = 1 \\ \sigma(W_k^\top f_{k-1}^\theta(v) + b_k) & k = 2, 3, \dots, L - 1 \\ \psi(W_L^\top f_{L-1}^\theta(v) + b_L) & k = L. \end{cases} \quad (4)$$

226 The policy  $\pi_\theta \in \mathbb{R}^{|\mathcal{S}| \times |\mathcal{A}|}$  parametrized by  $\theta$  is the output of the final layer:

$$\pi_\theta(\cdot | s) = f_L^\theta(\phi(s)) \in \Delta_{\mathcal{A}}, \quad \forall s \in \mathcal{S}.$$

227 Our analysis relies two assumptions about the structure of the neural network. The first concerns the  
 228 invertibility of  $\sigma(\cdot)$  as well as the continuity and uniqueness of its inverse, which can be guaranteed  
 229 by the following:

230 **Assumption 2**  $\sigma$  is strictly monotonic and  $\sigma(\mathbb{R}) = \mathbb{R}$ . In addition, there do not exist non-zero scalars  
 231  $\{p_i, q_i\}_{i=1}^m$  with  $q_i \neq q_j, \forall i \neq j$  such that for some  $m > 0$ ,  $\sigma(x) = \sum_{i=1}^m p_i \sigma(x - q_i), \forall x \in \mathbb{R}$ .

232 We note that this assumption holds for common activation functions including leaky-ReLU and  
 233 parametric ReLU [Xu et al., 2015].

234 Our second assumption is that the neural network is sufficiently over-parameterized and that the  
 235 number of parameters decreases with each layer.

236 **Assumption 3** *The output of the first layer is wider than  $2|\mathcal{S}|$ , and the width of the network decreases  
 237 over the layers, i.e.*

$$n_1 \geq 2|\mathcal{S}|, \text{ and } n_1 > n_2 > \dots > n_L = |\mathcal{A}|.$$

238 Neural networks meeting this criteria have a number of weight parameters that is larger than the  
 239 cardinality of the state space, making them impractical for large  $|\mathcal{S}|$ . While ongoing work seeks to  
 240 relax or remove this assumption, we point out that similar over-parameterization assumptions are  
 241 critical and very common in most existing works on the theory of neural networks [Zou and Gu, 2019,  
 242 Nguyen, 2019, Liu et al., 2022, Martinetz and Martinetz, 2022, Pandey and Kumar, 2023].

243 The  $\lambda$ -superlevel set of the value function with respect to  $\theta$  under reward function  $r$  is

$$\mathcal{U}_{\lambda,r}^{\Omega} \triangleq \{\theta \in \Omega \mid J_r(\pi_{\theta}) \geq \lambda\}.$$

244 Our next main theoretical result guarantees the connectedness of  $\mathcal{U}_{\lambda,r}^{\Omega}$ .

245 **Theorem 2** *Under Assumptions 1-3, the superlevel set  $\mathcal{U}_{\lambda,r}^{\Omega}$  is connected for any  $\lambda \in \mathbb{R}$ . In addition,  
 246 with  $J_{r,\Omega}(\theta) \triangleq J_r(\pi_{\theta})$ , the collection of functions  $\{J_{r,\Omega}(\cdot) : \Omega \rightarrow \mathbb{R}\}_{r \in \mathbb{R}^{|\mathcal{S}| \times |\mathcal{A}|}}$  is equiconnected.*

247 The proof of this theorem is deferred to the appendix. Similar to Theorem 1, the claim in Theorem 2  
 248 on the equiconnectedness of  $\{J_{r,\Omega}\}_{r \in \mathbb{R}^{|\mathcal{S}| \times |\mathcal{A}|}}$  is again stronger than the connectedness of  $\mathcal{U}_{\lambda,r}^{\Omega}$  and  
 249 needs to be derived for the application to minimax theorems, which we discuss in the next section.

## 250 4 Application to Robust Reinforcement Learning

251 In this section, we consider the robust RL problem under adversarial reward attack, which can be  
 252 formulated as a convex-nonconcave minimax optimization program. In Section 4.1, we show that the  
 253 minimax equality holds for this optimization program in the tabular policy setting and under policies  
 254 represented by a class of neural networks, as a consequence of our results in Sections 2 and 3. To  
 255 our best knowledge, the existence of the Nash equilibrium for this robust RL problem has not been  
 256 established before even in the tabular case. A specific example of this type of robust RL problems is  
 257 given in Section 4.2.

### 258 4.1 Minimax Theorem

259 Robust RL in general studies identifying a policy with reliable performance under uncertainty or  
 260 attacks. A wide range of formulations have been proposed for robust RL (which we reviewed in  
 261 details in Section 1.2), and an important class of formulations takes the form of defending against an  
 262 adversary that can modify the reward function in a convex manner. Specifically, the objective of the  
 263 learning agent can be described as solving the following minimax optimization problem

$$\max_{\pi \in \Delta_{\mathcal{A}}^{\mathcal{S}}} \min_{r \in \mathcal{C}} J_r(\pi), \quad (5)$$

264 where  $\mathcal{C}$  is some convex set. It is unclear from the existing literature whether minimax inequality  
 265 holds for this problem, i.e.

$$\max_{\pi \in \Delta_{\mathcal{A}}^{\mathcal{S}}} \min_{r \in \mathcal{C}} J_r(\pi) = \min_{r \in \mathcal{C}} \max_{\pi \in \Delta_{\mathcal{A}}^{\mathcal{S}}} J_r(\pi), \quad (6)$$

266 and we provide a definitive answer to this question. We note that there exists a classic minimax  
 267 theorem on a special class of convex-nonconcave functions [Simons, 1995], which we adapt and  
 268 simplify as follows.

269 **Theorem 3** Consider a separately continuous function  $f : \mathcal{X} \times \mathcal{Y} \rightarrow \mathbb{R}$ , with  $\mathcal{Y}$  being a convex,  
 270 compact set. Suppose that  $f(x, \cdot)$  is convex for all  $x \in \mathcal{X}$ . Also suppose that the collection of  
 271 functions  $\{f(\cdot, y)\}_{y \in \mathcal{Y}}$  is equiconnected. Then, we have

$$\sup_{x \in \mathcal{X}} \min_{y \in \mathcal{Y}} f(x, y) = \min_{y \in \mathcal{Y}} \sup_{x \in \mathcal{X}} f(x, y). \quad (7)$$

272 Theorem 3 states that the minimax equality holds under two main conditions (other than the continuity  
 273 condition, which can easily be verified to hold for  $J_r(\pi)$ ). First, the function  $f(x, y)$  needs to be  
 274 convex with respect to the variable  $y$  within a convex, compact constraint set. Second,  $f(x, y)$  needs  
 275 to have a connected superlevel set with respect to  $x$ , and the path function constructed to prove the  
 276 connectedness of the superlevel set is independent of  $y$ . As we have shown in this section and earlier  
 277 in the paper, if we model  $J_r(\pi)$  by  $f(x, y)$  with  $\pi$  and  $r$  corresponding to  $x$  and  $y$ , both conditions  
 278 are observed by the optimization problem (5), which allows us to state the following corollary.

279 **Corollary 1** Suppose that the Markov chain  $\mathcal{M}$  satisfies Assumption 1 on ergodicity. Then, the  
 280 minimax equality (6) holds.

281 When the neural network presented in Section 3 is used to represent the policy, the collection of  
 282 functions  $\{J_{r, \Omega}\}_r$  is also equiconnected. This allows us to extend the minimax equality above to the  
 283 neural network policy class. Specifically, consider problem (5) where the policy  $\pi_\theta$  is represented by  
 284 the parameter  $\theta \in \Omega$  as described in Section 3. Using  $f(x, y)$  to model  $J_r(\pi_\theta)$  with  $x$  and  $y$  mirroring  
 285  $\theta$  and  $r$ , we can easily establish the minimax theorem in this case as a consequence of Theorem 2 and 3.

286 **Corollary 2** Suppose that the Markov chain  $\mathcal{M}$  satisfies Assumption 1 on ergodicity and that the  
 287 neural policy class satisfies Assumptions 2-3. Then, we have

$$\sup_{\theta \in \Omega} \min_{r \in \mathcal{C}} J_r(\pi_\theta) = \min_{r \in \mathcal{C}} \sup_{\theta \in \Omega} J_r(\pi_\theta). \quad (8)$$

288 Corollary 1 and 2 establish the minimax equality (or equivalently, the existence of the Nash equilib-  
 289 rium) for the robust reinforcement learning problem under adversarial reward attack for the tabular  
 290 and neural network policy class, respectively. To our best knowledge, these results are both novel and  
 291 previously unknown in the existing literature. The Nash equilibrium is an important global optimality  
 292 notion in minimax optimization, and the knowledge on its existence can provide strong guidance on  
 293 designing and analyzing algorithms for solving the problem.

## 294 4.2 Example - Defense Against Reward Poisoning

295 We now discuss a particular example of (5). We consider the infinite horizon, average reward MDP  
 296  $\mathcal{M} = (\mathcal{S}, \mathcal{A}, \mathcal{P}, r)$  introduced in Section 2, where  $r$  is the true, unpoisoned reward function. Let  
 297  $\Pi^{\text{det}}$  denote the set of deterministic policies from  $\mathcal{S}$  to  $\mathcal{A}$ . With the perfect knowledge of this MDP,  
 298 an attacker has a target policy  $\pi_\dagger \in \Pi^{\text{det}}$  and tries to make the learning agent adopt the policy by  
 299 manipulating the reward function. Mathematically, the goal of the attacker can be described by the  
 300 function  $\text{Attack}(r, \pi_\dagger, \epsilon_\dagger)$  which returns a poisoned reward under the true reward  $r$ , the target policy  
 301  $\pi_\dagger$ , and a pre-selected margin parameter  $\epsilon_\dagger \geq 0$ .  $\text{Attack}(r, \pi_\dagger, \epsilon_\dagger)$  is the solution to the following  
 302 optimization problem

$$\begin{aligned} \text{Attack}(r, \pi_\dagger, \epsilon_\dagger) &= \underset{r'}{\operatorname{argmin}} \sum_{s \in \mathcal{S}, a \in \mathcal{A}} (r'(s, a) - r(s, a))^2 \\ &\text{s. t. } J_{r'}(\pi_\dagger) \geq J_r(\pi) + \epsilon_\dagger, \quad \forall \pi \in \Pi^{\text{det}} \setminus \pi_\dagger. \end{aligned} \quad (9)$$

303 In other words, the attacker needs to minimally modify the reward function to make  $\pi_\dagger$  the optimal  
 304 policy under the poisoned reward. This optimization program minimizes a quadratic loss under a  
 305 finite number of linear constraints and is obviously convex.

306 The learning agent observes the poisoned reward  $r_\dagger = \text{Attack}(r, \pi_\dagger, \epsilon_\dagger)$  rather than the original  
 307 reward  $r$ . As noted in Banihashem et al. [2021], without any defense, the learning agent solves the  
 308 policy optimization problem under  $r_\dagger$  to find  $\pi_\dagger$ , which may perform arbitrarily badly under the  
 309 original reward. One way to defend against the attack is to maximize the performance of the agent  
 310 in the worst possible case of the original reward, which leads to solving a minimax optimization



311 program of the form

$$\max_{\pi \in \Delta_{\mathcal{A}}^S} \min_{r'} J_{r'}(\pi) \quad \text{s. t.} \quad \text{Attack}(r', \pi_{\dagger}, \epsilon_{\dagger}) = r_{\dagger}. \quad (10)$$

312 When the policy  $\pi$  is fixed, (10) reduces to

$$\min_{r'} J_{r'}(\pi) \quad \text{s. t.} \quad \text{Attack}(r', \pi_{\dagger}, \epsilon_{\dagger}) = r_{\dagger}. \quad (11)$$

313 With the justification deferred to Appendix D, we point out that (11) consists of a linear objective  
 314 function and a convex (and compact) constraint set, and is therefore a convex program. On the other  
 315 hand, when we fix the reward  $r'$ , (10) reduces to a standard policy optimization problem.

316 We are interested in investigating whether the following minimax equality holds.

$$\max_{\pi \in \Delta_{\mathcal{A}}^S} \min_{r': \text{Attack}(r', \pi_{\dagger}, \epsilon_{\dagger}) = r_{\dagger}} J_{r'}(\pi) = \min_{r': \text{Attack}(r', \pi_{\dagger}, \epsilon_{\dagger}) = r_{\dagger}} \max_{\pi \in \Delta_{\mathcal{A}}^S} J_{r'}(\pi). \quad (12)$$

317 This is a special case of (5) with  $\mathcal{C} = \{r' \mid \text{Attack}(r', \pi_{\dagger}, \epsilon_{\dagger}) = r_{\dagger}\}$ , which can be verified to be a  
 318 convex set. Therefore, the validity of (12) directly follows from Corollary 1. Similarly, in the setting  
 319 of neural network parameterized policy we can establish

$$\max_{\theta \in \Omega} \min_{r': \text{Attack}(r', \pi_{\dagger}, \epsilon_{\dagger}) = r_{\dagger}} J_{r'}(\pi_{\theta}) = \min_{r': \text{Attack}(r', \pi_{\dagger}, \epsilon_{\dagger}) = r_{\dagger}} \max_{\theta \in \Omega} J_{r'}(\pi_{\theta})$$

320 as a result of Corollary 2.

## 321 5 Conclusions & Future Work

322 We study the superlevel set of the policy optimization problem under the MDP framework and show  
 323 that it is always a connected set under a tabular policy and for policies parameterized by a class of  
 324 neural networks. We apply this result to derive a previously unknown minimax theorem for a robust  
 325 RL problem. An immediate future direction of the work is to investigate whether/how the result  
 326 discussed in this paper can be used to design better RL algorithms. In Fatkhullin and Polyak [2021],  
 327 the authors show that the original LQR problem has connected level sets, but the partially observable  
 328 LQR does not. It is interesting to study whether this observation extends to the MDP setting, i.e. the  
 329 policy optimization problem under a partially observable MDP can be shown to have disconnected  
 330 superlevel sets.

## 331 References

- 332 Leonard Adolphs, Hadi Daneshmand, Aurelien Lucchi, and Thomas Hofmann. Local saddle point  
 333 optimization: A curvature exploitation approach. In *The 22nd International Conference on*  
 334 *Artificial Intelligence and Statistics*, pages 486–495. PMLR, 2019.
- 335 Alekh Agarwal, Sham M Kakade, Jason D Lee, and Gaurav Mahajan. Optimality and approximation  
 336 with policy gradient methods in markov decision processes. In *Conference on Learning Theory*,  
 337 pages 64–66. PMLR, 2020.
- 338 Alekh Agarwal, Sham M Kakade, Jason D Lee, and Gaurav Mahajan. On the theory of policy  
 339 gradient methods: Optimality, approximation, and distribution shift. *The Journal of Machine*  
 340 *Learning Research*, 22(1):4431–4506, 2021.
- 341 Kai Arulkumaran, Marc Peter Deisenroth, Miles Brundage, and Anil Anthony Bharath. Deep  
 342 reinforcement learning: A brief survey. *IEEE Signal Processing Magazine*, 34(6):26–38, 2017.
- 343 Kiarash Banihashem, Adish Singla, and Goran Radanovic. Defense against reward poisoning attacks  
 344 in reinforcement learning. *arXiv preprint arXiv:2102.05776*, 2021.
- 345 Jalaj Bhandari and Daniel Russo. Global optimality guarantees for policy gradient methods. *arXiv*  
 346 *preprint arXiv:1906.01786*, 2019.
- 347 Shicong Cen, Chen Cheng, Yuxin Chen, Yuting Wei, and Yuejie Chi. Fast global convergence  
 348 of natural policy gradient methods with entropy regularization. *Operations Research*, 70(4):  
 349 2563–2578, 2022.

- 350 Constantinos Daskalakis and Ioannis Panageas. The limit points of (optimistic) gradient descent in  
351 min-max optimization. *Advances in neural information processing systems*, 31, 2018.
- 352 J-CI Evard and Farhad Jafari. The set of all  $m \times n$  rectangular real matrices of rank  $r$  is connected by  
353 analytic regular arcs. *Proceedings of the American Mathematical Society*, 120(2):413–419, 1994.
- 354 Ky Fan. Minimax theorems. *Proceedings of the National Academy of Sciences*, 39(1):42–47, 1953.
- 355 Ilyas Fatkhullin and Boris Polyak. Optimizing static linear feedback: Gradient method. *SIAM Journal  
356 on Control and Optimization*, 59(5):3887–3911, 2021.
- 357 Maryam Fazel, Rong Ge, Sham Kakade, and Mehran Mesbahi. Global convergence of policy gradient  
358 methods for the linear quadratic regulator. In *International conference on machine learning*, pages  
359 1467–1476. PMLR, 2018.
- 360 Robert Gower, Othmane Sebbouh, and Nicolas Loizou. Sgd for structured nonconvex functions:  
361 Learning rates, minibatching and interpolation. In *International Conference on Artificial Intelli-  
362 gence and Statistics*, pages 1315–1323. PMLR, 2021.
- 363 Vineet Goyal and Julien Grand-Clement. Robust markov decision processes: Beyond rectangularity.  
364 *Mathematics of Operations Research*, 2022.
- 365 Aaron J Havens, Zhanhong Jiang, and Soumik Sarkar. Online robust policy learning in the presence  
366 of unknown adversaries. *arXiv preprint arXiv:1807.06064*, 2018.
- 367 Chi Jin, Praneeth Netrapalli, and Michael Jordan. What is local optimality in nonconvex-nonconcave  
368 minimax optimization? In *International conference on machine learning*, pages 4880–4889.  
369 PMLR, 2020.
- 370 Hamed Karimi, Julie Nutini, and Mark Schmidt. Linear convergence of gradient and proximal-  
371 gradient methods under the Polyak-Lojasiewicz condition. In *Machine Learning and Knowledge  
372 Discovery in Databases: European Conference, ECML PKDD 2016, Riva del Garda, Italy,  
373 September 19-23, 2016, Proceedings, Part I 16*, pages 795–811. Springer, 2016.
- 374 Yan Li, Tuo Zhao, and Guanghui Lan. First-order policy optimization for robust markov decision  
375 process. *arXiv preprint arXiv:2209.10579*, 2022.
- 376 Chaoyue Liu, Libin Zhu, and Mikhail Belkin. Loss landscapes and optimization in over-parameterized  
377 non-linear systems and neural networks. *Applied and Computational Harmonic Analysis*, 59:  
378 85–116, 2022.
- 379 Julius Martinetz and Thomas Martinetz. Highly over-parameterized classifiers generalize since bad  
380 solutions are rare. *arXiv preprint arXiv:2211.03570*, 2022.
- 381 Jincheng Mei, Chenjun Xiao, Csaba Szepesvari, and Dale Schuurmans. On the global convergence  
382 rates of softmax policy gradient methods. In *International Conference on Machine Learning*, pages  
383 6820–6829. PMLR, 2020.
- 384 Hesameddin Mohammadi, Armin Zare, Mahdi Soltanolkotabi, and Mihailo R Jovanović. Convergence  
385 and sample complexity of gradient methods for the model-free linear-quadratic regulator problem.  
386 *IEEE Transactions on Automatic Control*, 67(5):2435–2450, 2021.
- 387 J v Neumann. Zur theorie der gesellschaftsspiele. *Mathematische annalen*, 100(1):295–320, 1928.
- 388 Quynh Nguyen. On connected sublevel sets in deep learning. In *International Conference on Machine  
389 Learning*, pages 4790–4799. PMLR, 2019.
- 390 Maher Nouiehed, Maziar Sanjabi, Tianjian Huang, Jason D Lee, and Meisam Razaviyayn. Solving  
391 a class of non-convex min-max games using iterative first order methods. *Advances in Neural  
392 Information Processing Systems*, 32, 2019.
- 393 Kishan Panaganti and Dileep Kalathil. Sample complexity of robust reinforcement learning with  
394 a generative model. In *International Conference on Artificial Intelligence and Statistics*, pages  
395 9582–9602. PMLR, 2022.

- 396 Eshan Pandey and Santosh Kumar. Exploring the generalization capacity of over-parameterized  
397 networks. *International Journal of Intelligent Systems and Applications in Engineering*, 11(1s):  
398 97–112, 2023.
- 399 Lerrel Pinto, James Davidson, Rahul Sukthankar, and Abhinav Gupta. Robust adversarial reinforce-  
400 ment learning. In *International Conference on Machine Learning*, pages 2817–2826. PMLR,  
401 2017.
- 402 Amin Rakhsha, Goran Radanovic, Rati Devidze, Xiaojin Zhu, and Adish Singla. Policy teaching  
403 via environment poisoning: Training-time adversarial attacks against reinforcement learning. In  
404 *International Conference on Machine Learning*, pages 7974–7984. PMLR, 2020.
- 405 Anindya Sarkar, Jiarui Feng, Yevgeniy Vorobeychik, Christopher Gill, and Ning Zhang. Reward  
406 delay attacks on deep reinforcement learning. *arXiv preprint arXiv:2209.03540*, 2022.
- 407 David Silver, Aja Huang, Chris J Maddison, Arthur Guez, Laurent Sifre, George Van Den Driessche,  
408 Julian Schrittwieser, Ioannis Antonoglou, Veda Panneershelvam, Marc Lanctot, et al. Mastering  
409 the game of go with deep neural networks and tree search. *nature*, 529(7587):484–489, 2016.
- 410 Stephen Simons. Minimax theorems and their proofs. In *Minimax and applications*, pages 1–23.  
411 Springer, 1995.
- 412 Maurice Sion. On general minimax theorems. *Pacific Journal of mathematics*, 8(1):171–176, 1958.
- 413 Chen Tessler, Yonathan Efroni, and Shie Mannor. Action robust reinforcement learning and applica-  
414 tions in continuous control. In *International Conference on Machine Learning*, pages 6215–6224.  
415 PMLR, 2019.
- 416 Eugene Vinitsky, Yuqing Du, Kanaad Parvate, Kathy Jang, Pieter Abbeel, and Alexandre Bayen.  
417 Robust reinforcement learning using adversarial populations. *arXiv preprint arXiv:2008.01825*,  
418 2020.
- 419 Jingkan Wang, Yang Liu, and Bo Li. Reinforcement learning with perturbed rewards. In *Proceedings*  
420 *of the AAAI conference on artificial intelligence*, volume 34, pages 6202–6209, 2020.
- 421 Mengdi Wang. Primal-dual  $\pi$  learning: Sample complexity and sublinear run time for ergodic markov  
422 decision problems. *arXiv preprint arXiv:1710.06100*, 2017.
- 423 Yue Wang, Alvaro Velasquez, George Atia, Ashley Prater-Bennette, and Shaofeng Zou. Robust  
424 average-reward markov decision processes. *arXiv preprint arXiv:2301.00858*, 2023.
- 425 Chen-Yu Wei, Mehdi Jafarnia Jahromi, Haipeng Luo, Hiteshi Sharma, and Rahul Jain. Model-  
426 free reinforcement learning in infinite-horizon average-reward markov decision processes. In  
427 *International conference on machine learning*, pages 10170–10180. PMLR, 2020.
- 428 Yue Frank Wu, Weitong Zhang, Pan Xu, and Quanquan Gu. A finite-time analysis of two time-scale  
429 actor-critic methods. *Advances in Neural Information Processing Systems*, 33:17617–17628, 2020.
- 430 Bing Xu, Naiyan Wang, Tianqi Chen, and Mu Li. Empirical evaluation of rectified activations in  
431 convolutional network. *arXiv preprint arXiv:1505.00853*, 2015.
- 432 Junchi Yang, Negar Kiyavash, and Niao He. Global convergence and variance reduction for a class of  
433 nonconvex-nonconcave minimax problems. *Advances in Neural Information Processing Systems*,  
434 33:1153–1165, 2020.
- 435 Zhuoran Yang, Yongxin Chen, Mingyi Hong, and Zhaoran Wang. Provably global convergence of  
436 actor-critic: A case for linear quadratic regulator with ergodic cost. *Advances in neural information*  
437 *processing systems*, 32, 2019.
- 438 Sihan Zeng, Thinh T Doan, and Justin Romberg. A two-time-scale stochastic optimization framework  
439 with applications in control and reinforcement learning. *arXiv preprint arXiv:2109.14756*, 2021.
- 440 Huan Zhang, Hongge Chen, Chaowei Xiao, Bo Li, Mingyan Liu, Duane Boning, and Cho-Jui  
441 Hsieh. Robust deep reinforcement learning against adversarial perturbations on state observations.  
442 *Advances in Neural Information Processing Systems*, 33:21024–21037, 2020.
- 443 Difan Zou and Quanquan Gu. An improved analysis of training over-parameterized deep neural  
444 networks. *Advances in neural information processing systems*, 32, 2019.

## 445 A Proof of Theorems

### 446 A.1 Proof of Theorem 1:

447 We note that there exists a bijective map between  $\pi$  and  $\hat{\mu}_\pi$  where  $\hat{\mu}_\pi$  is induced by  $\pi$  according to  
 448 (2) and conversely

$$\pi(a | s) = \frac{\hat{\mu}_\pi(s, a)}{\mu_\pi(s)} = \frac{\hat{\mu}_\pi(s, a)}{\sum_{a \in \mathcal{A}} \hat{\mu}_\pi(s, a)}, \quad (13)$$

449 provided that  $\mu_\pi(s) \neq 0$ , which is guaranteed by Assumption 1. Eq. (13) inspires the construction of  
 450 the path map.

451 To prove that the superlevel set is connected, we show that for any  $\lambda \in \mathbb{R}$  and  $\pi_1, \pi_2 \in \mathcal{U}_{\lambda, r}$ , there  
 452 exists a continuous path map  $p : [0, 1] \rightarrow \mathcal{U}_{\lambda, r}$  such that  $p(0) = \pi_1$  and  $p(1) = \pi_2$ . We now construct  
 453 the path function  $p$  by defining

$$p(\alpha)(a | s) = \frac{\alpha \mu_{\pi_1}(s) \pi_1(a | s) + (1 - \alpha) \mu_{\pi_2}(s) \pi_2(a | s)}{\alpha \mu_{\pi_1}(s) + (1 - \alpha) \mu_{\pi_2}(s)},$$

454 which is well-defined for all  $\alpha \in [0, 1]$  as  $\mu_{\pi_1}(s), \mu_{\pi_2}(s)$  are positive for all  $s \in \mathcal{S}$ . Note that the  
 455 construction of  $p$  does not depend on the reward function  $r$ . It is easy to see that  $p(\alpha) \in \Delta_{\mathcal{A}}^{\mathcal{S}}$  is a  
 456 continuous in  $\alpha$ . To stress that  $p(\alpha)$  is in the policy space, we denote  $\pi_\alpha = p(\alpha)$ .

457 Recall the definition of the transition probability matrix in (1). We define  $B \in \mathbb{R}^{|\mathcal{S}|}$  as

$$B = P^{\pi_\alpha} \cdot (\alpha \mu_{\pi_1} + (1 - \alpha) \mu_{\pi_2}).$$

458 Each entry of  $B$  can be expressed as

$$\begin{aligned} B(s') &= \sum_{s, a} \mathcal{P}(s' | s, a) \pi_\alpha(a | s) (\alpha \mu_{\pi_1}(s) + (1 - \alpha) \mu_{\pi_2}(s)) \\ &= \sum_{s, a} \mathcal{P}(s' | s, a) \frac{\alpha \mu_{\pi_1}(s) \pi_1(a | s) + (1 - \alpha) \mu_{\pi_2}(s) \pi_2(a | s)}{\alpha \mu_{\pi_1}(s) + (1 - \alpha) \mu_{\pi_2}(s)} (\alpha \mu_{\pi_1}(s) + (1 - \alpha) \mu_{\pi_2}(s)) \\ &= \sum_{s, a} \mathcal{P}(s' | s, a) \alpha \mu_{\pi_1}(s) \pi_1(a | s) + \sum_{s, a} \mathcal{P}(s' | s, a) (1 - \alpha) \mu_{\pi_2}(s) \pi_2(a | s) \\ &= \alpha \sum_{s, a} P_{s', s}^{\pi_1} \mu_{\pi_1}(s) + (1 - \alpha) \sum_{s, a} P_{s', s}^{\pi_2} \mu_{\pi_2}(s) \\ &= \alpha \mu_{\pi_1}(s') + (1 - \alpha) \mu_{\pi_2}(s'), \end{aligned}$$

459 which implies

$$P^{\pi_\alpha} \cdot (\alpha \mu_{\pi_1} + (1 - \alpha) \mu_{\pi_2}) = \alpha \mu_{\pi_1} + (1 - \alpha) \mu_{\pi_2}. \quad (14)$$

460 A consequence of Assumption 1 is that for any policy  $\pi$  there is a unique eigenvector of  $P^\pi$  associated  
 461 with the eigenvalue 1, and this eigenvector (properly normalized) is the stationary distribution.  
 462 Therefore, (14) means that  $\alpha \mu_{\pi_1} + (1 - \alpha) \mu_{\pi_2}$  has to be the stationary distribution under policy  $\pi_\alpha$ , i.e.

$$\mu_{\pi_\alpha} = \alpha \mu_{\pi_1} + (1 - \alpha) \mu_{\pi_2}.$$

463 As a result, for all  $s \in \mathcal{S}, a \in \mathcal{A}$

$$\begin{aligned} \hat{\mu}_{\pi_\alpha}(s, a) &= \mu_{\pi_\alpha}(s) \pi_\alpha(a | s) \\ &= (\alpha \mu_{\pi_1}(s) + (1 - \alpha) \mu_{\pi_2}(s)) \frac{\alpha \mu_{\pi_1}(s) \pi_1(a | s) + (1 - \alpha) \mu_{\pi_2}(s) \pi_2(a | s)}{\alpha \mu_{\pi_1}(s) + (1 - \alpha) \mu_{\pi_2}(s)} \\ &= \alpha \mu_{\pi_1}(s) \pi_1(a | s) + (1 - \alpha) \mu_{\pi_2}(s) \pi_2(a | s) \\ &= \alpha \hat{\mu}_{\pi_1}(s, a) + (1 - \alpha) \hat{\mu}_{\pi_2}(s, a). \end{aligned}$$

464 Note that  $J_r(\pi) = \sum_{s \in \mathcal{S}, a \in \mathcal{A}} r(s, a) \hat{\mu}_\pi(s, a)$ . Since  $\pi_{\pi_1}, \pi_{\pi_2} \in \mathcal{U}_{\lambda, r}$ , we know

$$\sum_{s \in \mathcal{S}, a \in \mathcal{A}} r(s, a) \hat{\mu}_{\pi_1}(s, a) \geq \lambda, \quad \sum_{s \in \mathcal{S}, a \in \mathcal{A}} r(s, a) \hat{\mu}_{\pi_2}(s, a) \geq \lambda.$$

465 Therefore, we have for any  $\alpha \in [0, 1]$

$$J_r(\pi_\alpha) = \sum_{s \in \mathcal{S}, a \in \mathcal{A}} r(s, a) \hat{\mu}_{\pi_\alpha}(s, a) = \sum_{s \in \mathcal{S}, a \in \mathcal{A}} r(s, a) (\alpha \hat{\mu}_{\pi_1}(s, a) + (1 - \alpha) \hat{\mu}_{\pi_2}(s, a)) \geq \lambda,$$

466 which implies  $\pi_\alpha \in \mathcal{U}_{\lambda, r}$ . So far we have verified that the constructed path map  $p$  is indeed continuous  
 467 and maps  $\alpha \in [0, 1]$  to  $\mathcal{U}_{\lambda, r}$  with  $p(0) = \pi_1$  and  $p(1) = \pi_2$ . This concludes the proof on the  
 468 connectedness of the superlevel set  $\mathcal{U}_{\lambda, r}$ . The claim on the equiconnectedness simply follows from  
 469 the fact that the construction of the path map  $p$  does not depend on the reward function.

470 ■

## 471 A.2 Proof of Theorem 2

472 We use  $X$  to denote the concatenation of the feature vectors across all states

$$X \triangleq \begin{bmatrix} \phi(s_1)^\top \\ \phi(s_2)^\top \\ \vdots \\ \phi(s_{|\mathcal{S}|})^\top \end{bmatrix} \in \mathbb{R}^{|\mathcal{S}| \times d}$$

473 In the analysis we may apply the softmax function  $\psi$  to a matrix in a row-wise fashion. Specifically,  
 474 for any  $n \geq 1$  and matrix  $M \in \mathbb{R}^{n \times |\mathcal{A}|}$ , we have

$$\psi(M)_{i,j} = \frac{\exp(M_{i,j})}{\sum_{j'=1}^{|\mathcal{A}|} \exp(M_{i,j'})} \quad \forall i = 1, \dots, n.$$

475 The softmax operator  $\psi$  can be inverted up to an additive constant factor. We define  $\psi_{inv}$  for any  
 476 matrix  $M \in \mathbb{R}^{n \times |\mathcal{A}|}$  as

$$\psi_{inv}(M)_{i,j} = \log(M_{i,j}) + c_i \quad \forall i, j,$$

477 with  $c_i$  determined such that  $\sum_{j=1}^{|\mathcal{A}|} \psi_{inv}(M)_{i,j} = 0$ . Note that  $\psi_{inv}$  is a right inverse of  $\psi$ , i.e.  
 478  $\psi(\psi_{inv}(M)) = M$  for all matrix  $M$ .

479 When the input to a neural network with parameter  $\theta$  is the feature table  $X$ , we denote the output of  
 480 layer  $k$  by  $F_k^\theta \in \mathbb{R}^{|\mathcal{S}| \times n_k}$ . According to (4),  $F_k^\theta$  can be expressed as

$$F_k^\theta = \begin{cases} \sigma(XW_1 + \mathbf{1}_{|\mathcal{S}|} b_1^\top) & k = 1 \\ \sigma(F_{k-1}^\theta W_k + \mathbf{1}_{|\mathcal{S}|} b_k^\top) & k = 2, 3, \dots, L-1 \\ \psi(F_{L-1}^\theta W_L + \mathbf{1}_{|\mathcal{S}|} b_L^\top) & k = L \end{cases}$$

481 where  $\mathbf{1}_{|\mathcal{S}|}$  is the all-one vector of dimension  $|\mathcal{S}| \times 1$ . Note that  $F_L^\theta \in \mathbb{R}^{|\mathcal{S}| \times |\mathcal{A}|}$  is the policy table  
 482 produced by the neural network, i.e.  $\pi_\theta = F_L^\theta$ .

483 The proof of Theorem 2 relies on the following intermediate results, which we now present. The  
 484 proof of Proposition 1 can be found in Appendix B.

485 **Proposition 1** *If  $\text{rank}(X) = |\mathcal{S}|$ , then under Assumption 1 and 2, the superlevel set  $\mathcal{U}_{\lambda, r}^\Omega$  is connected*  
 486 *for all  $\lambda \in \mathbb{R}$ .*

487 **Lemma 1** *Let  $(X, W, b, V) \in \mathbb{R}^{|\mathcal{S}| \times n_0} \times \mathbb{R}^{n_0 \times n_1} \times \mathbb{R}^{n_1} \times \mathbb{R}^{n_1 \times n_2}$ . Let  $Z = \sigma(XW + \mathbf{1}_{|\mathcal{S}|} b^\top) V$ .*  
 488 *Suppose  $X$  has distinct rows. Then, under Assumption 2 and 3, there exists a continuous path map*  
 489  *$c : [0, 1] \rightarrow \mathbb{R}^{n_0 \times n_1} \times \mathbb{R}^{n_1} \times \mathbb{R}^{n_1 \times n_2}$  with  $c(\lambda) = (W(\lambda), b(\lambda), V(\lambda))$  such that*

490 1)  $c(0) = (W, b, V)$ ,

491 2)  $\sigma(XW(\lambda) + \mathbf{1}_{|\mathcal{S}|} b(\lambda)^\top) V(\lambda) = Z, \forall \lambda \in [0, 1]$ ,

492 3)  $\text{rank}(\sigma(XW(1) + \mathbf{1}_{|\mathcal{S}|} b(1)^\top)) = N$ .

493 **Lemma 2** *Let  $(X, W, V, W') \in \mathbb{R}^{|\mathcal{S}| \times n_0} \times \mathbb{R}^{n_0 \times n_1} \times \mathbb{R}^{n_1 \times n_2} \times \mathbb{R}^{n_0 \times n_1}$ . Suppose  $\text{rank}(\sigma(XW)) =$   
 494  $|\mathcal{S}|$  and  $\text{rank}(\sigma(XW')) = |\mathcal{S}|$ . Then, under Assumption 2 and 3, there exists a continuous path map  
 495  $c : [0, 1] \rightarrow \mathbb{R}^{n_0 \times n_1} \times \mathbb{R}^{n_1 \times n_2}$  with  $c(\lambda) = (W(\lambda), V(\lambda))$  such that*

496 1)  $c(0) = (W, V)$ ,

497 2)  $\sigma(XW(\lambda))V(\lambda) = \sigma(XW)V, \forall \lambda \in [0, 1]$ ,

498 3)  $W(1) = W'$ .

499 To prove Theorem 2, it suffices to show that for any  $\theta_1 = (W_{1,l}, b_{1,l})_{l=1}^L \in \mathcal{U}_{\lambda,r}^\Omega$  and  $\theta_2 =$   
500  $(W_{2,l}, b_{2,l})_{l=1}^L \in \mathcal{U}_{\lambda,r}^\Omega$  there exists a connected path that is completely within  $\mathcal{U}_{\lambda,r}^\Omega$ .

501 Applying Lemma 1 with  $(X, W_{1,1}, b_{1,1}, W_{1,2})$  and  $(X, W_{2,1}, b_{2,1}, W_{2,2})$ , the problem simplifies to  
502 showing the existence of a continuous path within  $\mathcal{U}_{\lambda,r}^\Omega$  that connects

$$\theta'_1 = ((W'_{1,1}, b'_{1,1}), (W'_{1,2}, b_{1,2}), (W_{1,l}, b_{1,l})_{l=3}^L)$$

503 and

$$\theta'_2 = ((W'_{2,1}, b'_{2,1}), (W'_{2,2}, b_{1,2}), (W_{2,l}, b_{2,l})_{l=3}^L)$$

504 such that

$$\text{rank}(F_1^{\theta'_1}) = \text{rank}(F_1^{\theta'_2}) = |\mathcal{S}|.$$

505 Then, we can apply Lemma 2 with  $([X, 1_{|\mathcal{S}|}], [W'_{1,1}, b'_{1,1}]^\top, W'_{1,2}, [W'_{2,1}, b'_{2,1}]^\top)$  to show that there  
506 is a continuous path between  $\theta'_1$  and  $\theta''_1$  with  $\theta''_1 = ((W''_{2,1}, b'_{2,1}), (W'_{1,2}, b_{1,2}), (W_{1,l}, b_{1,l})_{l=3}^L)$  such  
507 that

$$\text{rank}(F_1^{\theta''_1}) = \text{rank}(F_1^{\theta'_1}) = |\mathcal{S}|.$$

508 As a consequence, now we simply have to show that  $\theta''_1$  and  $\theta'_2$  is connected by a continuous path  
509 within  $\mathcal{U}_{\lambda,r}^\Omega$ .

510 Note that  $\theta''_1$  and  $\theta'_2$  have identical first layer parameters and thus the same first layer output, which  
511 is full rank. This allows us to treat the layers from 2 to  $L$  as a new network and apply Proposition  
512 1 (which requires the input to be full rank) to the new network to guarantee that there exists a  
513 continuous path map  $c : [0, 1] \rightarrow \Omega_2 \times \dots \times \Omega_k$  such that  $c(0) = ((W''_{1,2}, b_{1,2}), (W_{1,l}, b_{1,l})_{l=3}^L)$ ,  
514  $c(1) = ((W'_{2,2}, b_{1,2}), (W_{2,l}, b_{2,l})_{l=3}^L)$ , and

$$\min\{J_r(\pi_{\theta_1}), J_r(\pi_{\theta_2})\} \leq J_r(\pi_{((W'_{2,1}, b'_{2,1}), c(\alpha))}) \leq \max\{J_r(\pi_{\theta_1}), J_r(\pi_{\theta_2})\}$$

515 for all  $\alpha \in [0, 1]$ . This implies that there is indeed a continuous path between  $\theta''_1$  and  $\theta'_2$  within  $\mathcal{U}_{\lambda,r}^\Omega$ .

516 Similar to the proof of Theorem 1, the claim on the connectedness simply follows from the fact that  
517 the construction of the path map  $p$  does not depend on the reward function. ■

## 518 B Proof of Proposition 1

519 For each layer of the neural network  $k = 1, \dots, L$ , we define  $\Omega_k^* \subseteq \Omega_k$  to be the set of weights  $W_k$   
520 and biases  $b_k$  of layer  $k$  such that  $W_k$  is full rank, i.e.

$$\Omega_k^* = \{(W_k, b_k) \in \Omega_k : W_k \text{ is full rank}\}. \quad (15)$$

521 We denote  $\Omega^* = \Omega_1^* \times \Omega_2^* \times \dots \times \Omega_L^*$ . Next, we introduce the following lemmas in aid of the analysis.

522 **Condition 1** Given  $\theta = (W_l, b_l)_{l=2}^L$ ,  $W_l$  has full rank for every  $l \in [2, L]$ .

523 **Lemma 3** Under Assumption 2, 3, and Condition 1, given any  $k \in [2, L]$  and matrix  $F \in \mathbb{R}^{|\mathcal{S}| \times n_k}$ ,  
524 there exists a continuous map  $h : \Omega_2^* \times \dots \times \Omega_k^* \times \mathbb{R}^{|\mathcal{S}| \times n_k} \rightarrow \Omega_1^*$  such that

525 1) Given  $((W_2, b_2), \dots, (W_k, b_k), F) \in \Omega_2^* \times \dots \times \Omega_k^* \times \mathbb{R}^{|\mathcal{S}| \times n_k}$ , we have

$$F_k^{h((W_l, b_l)_{l=2}^k, F), (W_l, b_l)_{l=2}^k} = F.$$

526 2) For any  $\theta^* = (W_l^*, b_l^*)_{l=1}^L \in \Omega_1 \times \Omega_2^* \times \dots \times \Omega_L^*$ , there exists a continuous path map  $p :$   
527  $[0, 1] \rightarrow \Omega_1 \times \Omega_2^* \times \dots \times \Omega_L^*$  such that  $p(0) = \theta^*$ ,  $p(1) = (h((W_l^*, b_l^*)_{l=2}^k, F_k^{\theta^*}), (W_l^*, b_l^*)_{l=2}^L)$ , and  
528  $F_L^{p(\alpha)} = F_L^{\theta^*}$  for all  $\alpha \in [0, 1]$ .

529 **Lemma 4** Given two connected sets  $\mathcal{A} \subseteq \mathbb{R}^{m_1 \times n}$  and  $\mathcal{B} \subseteq \mathbb{R}^{n \times m_2}$ , the set  $\{ab \mid a \in \mathcal{A}, b \in \mathcal{B}\}$  is  
 530 connected. Given two connected sets  $\mathcal{A}, \mathcal{B} \subseteq \mathbb{R}^{m \times n}$ , the set  $\{a + b \mid a \in \mathcal{A}, b \in \mathcal{B}\}$  is connected.

531 **Lemma 5** Under Assumption 2, for any  $\theta \in \Omega$ , there exist  $\theta^* \in \Omega^*$  and a continuous path map  
 532  $p : [0, 1] \rightarrow \Omega$  such that  $p(0) = \theta$ ,  $p(1) = \theta^*$ , and  $F_L^{p(\alpha)} = F_L^\theta$  for all  $\alpha \in [0, 1]$ .

533 **Lemma 6** If  $n < m$ , then the set  $\mathcal{F} = \{F \in \mathbb{R}^{m \times n} \mid \text{rank}(F) = n\}$  is connected. In other words,  
 534 given  $F_1, F_2 \in \mathcal{F}$ , there exists a continuous path map  $q : [0, 1] \rightarrow \mathcal{F}$  such that  $q(0) = F_1$  and  
 535  $q(1) = F_2$ .

536 Fix a  $\lambda \in \mathbb{R}$ . To show the superlevel set  $\mathcal{U}_{\lambda, r}^\Omega$  is connected, it suffices to show that for any  $\theta_1, \theta_2 \in \mathcal{U}_{\lambda, r}^\Omega$ ,  
 537 there exists a continuous path between them that is completely in  $\mathcal{U}_{\lambda, r}^\Omega$ .

538 Without any loss of generality, we can safely assume that both  $\theta_1 = (W_{1,l}, b_{1,l})_{l=1}^L$  and  $\theta_2 =$   
 539  $(W_{2,l}, b_{2,l})_{l=1}^L$  satisfy Condition 1, since otherwise by Lemma 5 we can find a continuous path from  
 540  $\theta_1$  and  $\theta_2$  that leads to one satisfying Condition 1. We denote the policies parameterized by  $\theta_1, \theta_2$  as  
 541  $\pi_1, \pi_2$ , i.e.

$$\pi_1 = F_L^{\theta_1}, \quad \pi_2 = F_L^{\theta_2}.$$

542 By Lemma 3, there is a continuous path from  $\theta_1/\theta_2$  to  $\theta'_1/\theta'_2$  where we define

$$\begin{aligned} \theta'_1 &= \left( h \left( (W_{1,l}, b_{1,l})_{l=2}^L, \pi_1 \right), (W_{1,l}, b_{1,l})_{l=2}^L \right), \\ \text{and } \theta'_2 &= \left( h \left( (W_{2,l}, b_{2,l})_{l=2}^L, \pi_2 \right), (W_{2,l}, b_{2,l})_{l=2}^L \right). \end{aligned}$$

543 Now, we just have to show that there exists a continuous path between  $\theta'_1$  and  $\theta'_2$  that is completely  
 544 within  $\mathcal{U}_{\lambda, r}^\Omega$ . By Lemma 6, we know that for  $l = 2, \dots, L$ , there exists a continuous path map  
 545  $q_l : [0, 1] \rightarrow \Omega_l^*$  such that  $q_l(1) = W_{1,l}$  and  $q_l(0) = W_{2,l}$ . Then, we construct the map  $q : [0, 1] \rightarrow \Omega$

$$q(\alpha) = \left( h \left( (q_l(\alpha), \alpha b_{1,l} + (1 - \alpha)b_{2,l})_{l=2}^L, \pi_1 \right), (q_l(\alpha), \alpha b_{1,l} + (1 - \alpha)b_{2,l})_{l=2}^L \right) \quad \forall \alpha \in [0, 1].$$

546 It is obvious that  $q$  is a continuous map as  $h, q_2, \dots, q_L$  are continuous. In addition,  $F_L^{q(\alpha)} = \pi_1$  for  
 547 all  $\alpha \in [0, 1]$ , and  $q(1) = \theta'_1$ . We define

$$\theta''_1 = q(0) = \left( h \left( (W_{2,l}, b_{2,l})_{l=2}^L, \pi_1 \right), (W_{2,l}, b_{2,l})_{l=2}^L \right).$$

548 Now our aim simplifies to finding a continuous path between  $\theta''_1$  and  $\theta'_2$  that is completely in  $\mathcal{U}_{\lambda, r}^\Omega$ . To  
 549 show that this path exists, we construct a continuous map  $t : [0, 1] \rightarrow \Omega$  as follows

$$t(\alpha) = \left( h \left( (W_{2,l}, b_{2,l})_{l=2}^L, \tilde{\pi}_\alpha \right), (W_{2,l}, b_{2,l})_{l=2}^L \right) \quad \forall \alpha \in [0, 1],$$

550 where  $\tilde{\pi}$  is defined entry-wise

$$\tilde{\pi}_\alpha(a \mid s) = \frac{\alpha \mu_{\pi_1}(s) \pi_1(a \mid s) + (1 - \alpha) \mu_{\pi_2}(s) \pi_2(a \mid s)}{\alpha \mu_{\pi_1}(s) + (1 - \alpha) \mu_{\pi_2}(s)}.$$

551 It can be seen that  $t$  is indeed continuous since  $\tilde{\pi}_\alpha$  is continuous in  $\alpha$ , and  $t(0) = \theta''_1$  and  $t(1) = \theta'_2$ .  
 552 What remains to be shown is that  $F_L^{t(\alpha)} \in \mathcal{U}_{\lambda, r}^\Omega$ , i.e.  $J_r(F_L^{t(\alpha)}) \geq \lambda$ . By the definition of  $h$  in Lemma  
 553 3,  $F_L^{t(\alpha)} = \tilde{\pi}_\alpha$ . It has been shown in the proof of Theorem 1 that indeed  $J_r(\tilde{\pi}_\alpha) \geq \lambda$  provided that  
 554  $J_r(\pi_1) \geq \lambda$  and  $J_r(\pi_2) \geq \lambda$ . This concludes the proof of Proposition 1.

555 ■

## 556 C Proof of Supporting Lemmas

### 557 C.1 Proof of Lemma 1

558 This lemma is adapted from Lemma 5.2 of Nguyen [2019].

559 **C.2 Proof of Lemma 2**

560 This lemma is adapted from Lemma 5.3 of Nguyen [2019].

561 **C.3 Proof of Lemma 3**

562 We provide a proof for the case  $k = L$ . For  $k \neq L$ , the proof can be found in Nguyen [2019][Lemma  
563 3.3].

564 For  $((W_2, b_2), \dots, (W_L, b_L), \pi) \in \Omega_2^* \times \dots \times \Omega_L^* \times \Delta_{\mathcal{A}}^S$ , we define the map  $h$  as follows

$$h((W_l, b_l)_{l=2}^L, \pi) = (\widehat{W}_1, \widehat{b}_1)$$

565 where  $\widehat{W}_1$  and  $\widehat{b}_1$  is defined as

$$\begin{cases} \begin{bmatrix} W_1 \\ b_1^\top \end{bmatrix} = [X, \mathbf{1}_{|S|}]^\dagger \sigma^{-1}(B_1), \\ B_l = (\sigma^{-1}(B_{l+1}) - \mathbf{1}_{|S|} b_{l+1}^\top) W_{l+1}^\dagger, \forall l \in [1, k-2] \\ B_{k-1} = (\psi_{inv}(\pi) - \mathbf{1}_{|S|} b_L^\top) W_L^\dagger \end{cases} \quad (16)$$

566 where we use  $A^\dagger$  to denote the Moore-Penrose inverse of a matrix  $A$ . If  $A$  has full column rank, then  
567 we have  $A^\dagger A = I$ . If  $A$  has full row rank, we have  $AA^\dagger = I$ . We can easily see that the defined  $h$   
568 operator is continuous as it is a composition of continuous operators.

569 Assumption 3, and Condition 1 imply that the matrices  $W_2, \dots, W_L$  all have full column rank, which  
570 means  $W_l^\dagger W_l = I$ . We also know that  $[X, \mathbf{1}_{|S|}]$  has full row rank by our assumption that  $X$  has full  
571 row rank, which means  $[X, \mathbf{1}_{|S|}][X, \mathbf{1}_{|S|}]^\dagger = I$ . Therefore, we can layerwise invert (16) and verify  
572 that

$$F_L^{h((W_l, b_l)_{l=2}^L, \pi), (W_l, b_l)_{l=2}^L} = \pi.$$

573 For every layer  $l = 2, \dots, L$ , we define the operator  $G_l : \mathbb{R}^{|S| \times n_{l-1}} \rightarrow \mathbb{R}^{|S| \times n_l}$

$$G_l(Y) = \begin{cases} \sigma(YW_l^* + \mathbf{1}_{|S|} (b_l^*)^\top) & l \in [2, L-1] \\ \psi(YW_L^* + \mathbf{1}_{|S|} (b_L^*)^\top) & l = L \end{cases}$$

574 We also define the operator  $H : \mathbb{R}^{(d+1) \times n_1} \rightarrow \mathbb{R}^{|S| \times n_1}$

$$H(Y) = \sigma([X, \mathbf{1}_{|S|}]Y).$$

575 To show the continuous path claimed in Lemma 3 exists, it suffices to show that the set  $\{(W_1, b_1) :$   
576  $F_L^{(W_1, b_1), (W_l^*, b_l^*)_{l=2}^L} = F_L^{\theta^*}\}$  is connected, which is equivalent to showing that the set  $f^{-1}(F_L^{\theta^*})$  is  
577 connected where  $f$  is defined as

$$f([W_1^\top, b_1]^\top) = G_L \circ \dots \circ G_2 \circ H([W_1^\top, b_1]^\top).$$

578 Note that the definition of  $f$  implies

$$f^{-1}(\pi) = H^{-1} \circ G_2^{-1} \circ \dots \circ G_L^{-1}(\pi). \quad (17)$$

579 Note that  $G_l^{-1}$  is

$$G_l^{-1}(F) = \begin{cases} (\psi_{inv}(F) + \{C \mid C_{i,j} = C_{i,j'}, \forall i, j \neq j'\} - \mathbf{1}_N b_L^\top) (W_L^*)^\dagger + \{B \mid BW_L^* = 0\}, & l = L \\ (\sigma^{-1}(F) - \mathbf{1}_N b_l^*) (W_l^*)^\dagger + \{B \mid BW_l^* = 0\}, & l = 2, \dots, L-1 \end{cases}$$

580 It is easy to verify that  $\{C \mid C_{i,j} = C_{i,j'}, \forall i, j \neq j'\}$  and  $\{B \mid BW_l^* = 0\}$  for all  $l = 2, \dots, L$ . Then,  
581 Lemma 4 implies that  $G_l^{-1}(F)$  is a connected set for all  $F$ .

582 Similarly,  $H^{-1}(F) = [X, \mathbf{1}_{|S|}]^\dagger \sigma^{-1}(F) + \{B \mid [X, \mathbf{1}_{|S|}]B = 0\}$  is also a connected set for all  $F$ .  
583 Therefore, from (17) we know that  $f^{-1}(F)$  is a connected set for any  $F$ , which concludes the proof  
584 of Lemma 3.

585 ■



586 **C.4 Proof of Lemma 4**

587 To show that the product of the two connected sets are connected, we consider any  $x, y \in \{ab \mid$   
588  $a \in \mathcal{A}, b \in \mathcal{B}\}$ . Obviously, there exist  $a_x, a_y \in \mathcal{A}$  and  $b_x, b_y \in \mathcal{B}$  such that  $x = a_x b_x, y = a_y b_y$ .  
589 The connectedness of  $\mathcal{A}$  and  $\mathcal{B}$  implies that there exists continuous path maps  $p_{\mathcal{A}} : [0, 1] \rightarrow \mathcal{A}$  and  
590  $p_{\mathcal{B}} : [0, 1] \rightarrow \mathcal{B}$  such that  $p_{\mathcal{A}}(0) = a_x, p_{\mathcal{A}}(1) = a_y, p_{\mathcal{B}}(0) = b_x, p_{\mathcal{B}}(1) = b_y$ . Define  $p(\alpha) = p_{\mathcal{A}} p_{\mathcal{B}}$   
591 for  $\alpha \in [0, 1]$ . It is obvious that  $p(\alpha) \in \{ab \mid a \in \mathcal{A}, b \in \mathcal{B}\}$  for all  $\alpha$ . Since the product of  
592 continuous maps is still continuous,  $p : [0, 1] \rightarrow \{ab \mid a \in \mathcal{A}, b \in \mathcal{B}\}$  is a continuous path map  
593 satisfying  $p(0) = x$  and  $p(1) = y$ . This implies that the set  $\{ab \mid a \in \mathcal{A}, b \in \mathcal{B}\}$  is a connected set.

594 A similar argument can be used to show that the sum of two connected sets is connected.

595 ■

596 **C.5 Proof of Lemma 5**

597 Define  $\tilde{F}_L((W_l, b_l)_{l=1}^L)$  as the output of the final layer before the softmax activation

$$\tilde{F}_L^{(W_l, b_l)_{l=1}^L} = F_{L-1} W_L + \mathbf{1}_{|S|} b_L^\top.$$

598 Then, existing results in the literature (such as Lemma 3.4 of Nguyen [2019]) show that for any  
599  $\theta \in \Omega$ , there exists a continuous path map  $p : [0, 1] \rightarrow \Omega$  such that  $p(0) = \theta, p(1) = \theta^* \in \Omega^*$ , and  
600  $\tilde{F}_L(p(\alpha)) = \tilde{F}_L(\theta)$  for all  $\alpha \in [0, 1]$ . This leads to our claim.

601 ■

602 **C.6 Proof of Lemma 6**

603 This lemma is adapted from Theorem 4 of Evard and Jafari [1994].

604 **D Convexity of Optimization Program (11)**

605 In this section, we show that (11) is a convex optimization program. First, we note that

$$J_{r'}(\pi) = \sum_{s,a} r'(s, a) \hat{\mu}_\pi = \hat{\mu}_\pi^\top r',$$

606 which means that the objective function is linear in the reward.

607 The constraint set is obvious closed. It is also bounded as the reward  $r(s, a) \in [0, U_r]$ . To prove the  
608 constraint set is convex, we need to show that for any  $r_1, r_2$  such that  $\text{Attack}(r_1, \pi_\dagger, \epsilon_\dagger) = r_\dagger$  and  
609  $\text{Attack}(r_2, \pi_\dagger, \epsilon_\dagger) = r_\dagger$ , we have

$$\text{Attack}(\alpha r_1 + (1 - \alpha) r_2, \pi_\dagger, \epsilon_\dagger) = r_\dagger, \quad \forall \alpha \in [0, 1]. \quad (18)$$

610 By the optimality condition of (9),  $r_\dagger$  being the optimal poisoned reward for true reward  $r_1$  and  $r_2$  is  
611 equivalent to

$$\langle r - r_\dagger, r_1 - r_\dagger \rangle \leq 0 \quad \text{and} \quad \langle r - r_\dagger, r_2 - r_\dagger \rangle \leq 0$$

612 for all  $r$  such that  $J_r(\pi_\dagger) \geq J_r(\pi) + \epsilon_\dagger, \forall \pi \in \Pi^{\text{det}} \setminus \pi_\dagger$ . By taking the convex combination of these  
613 two inequalities, we have for any  $\alpha \in [0, 1]$

$$\langle r - r_\dagger, \alpha r_1 + (1 - \alpha) r_2 - r_\dagger \rangle \leq 0 \quad (19)$$

614 for all  $r$  such that  $J_r(\pi_\dagger) \geq J_r(\pi) + \epsilon_\dagger, \forall \pi \in \Pi^{\text{det}} \setminus \pi_\dagger$ . Again by the optimality condition of (9),  
615 (19) is equivalent to (18).

616 At this point, we have shown that (11) has a linear objective function and a convex (and also compact)  
617 constraint set. As a result, the optimization program is convex.
